# Supplementary material
Source: publisher figshare collection journal article supplement (https://rs.figshare.com/ndownloader/files/6863400)
Supplement: Supplementary file 1 [file 6863400]

## Sheet: Study1
Shimizu et al., "The impact of cerebellar transcranial direct current stimulation (tDCS) on learning fine-motor sequences" doi: 10.1098/rstb.2016.0050; Study 1 data
Notes: The following subjects were excluded in the analysis as described in the paper: 923 (stimulator malfunction); 913, 937, 939, 943 (incorrect montage used); 903, 904, 908, 909, 920, 933, 941, 961, 963, 972, 978, 983 (accuracy criteria). The normalized RTs were calculated with the median RTs.
Gender: 0 = man, 1 = woman, 2 = decline to state; Handedness: 0 = RH, 1 = LH, 2 = ambidextrous; tDCS condition: 0 = sham, 1 = anode, 2 = cathode
SubjectID	Age	Gender	Handedness	tDCS condition	P1 % errors	P1 # errors	P1 mean RT	P1 median RT	P2 % errors	P2 # errors	P2 mean RT	P2 median RT	P3 % errors	P3 # errors	P3 mean RT	P3 median RT	P4 % errors	P4# errors	P4 mean RT	P4 median RT	P5 % errors	P5 # errors	P5 mean RT	P5 median RT	P6 % errors	P6 # errors	P6 mean RT	P6 median RT	T1 % errors	T1 # errors	T1 mean RT	T1 median RT	T2 % errors	T2 # errors	T2 mean RT	T2 median RT	T3 % errors	T3 # errors	T3 mean RT	T3 median RT	T4 % errors	T4# errors	T4 mean RT	T4 median RT	T5 % errors	T5 # errors	T5 mean RT	T5 median RT	T6 % errors
901	28	1	0	1	7.81	15	2.96639	3.01308	7.81	15	2.97798	2.99771	4.17	8	3.21166	3.19947	2.6	5	3.10447	3.09333	3.65	7	2.9828	2.953	4.17	8	3.12094	3.17643	7.81	15	2.91205	2.96983	7.81	15	2.89969	2.84479	3.13	6	2.96615	2.92236	3.65	7	2.82746	2.87333	1.04	2	2.7721	2.72081	5.21
902	20	1	0	1	1.56	3	2.86807	2.88779	4.17	8	2.8013	2.73825	2.6	5	2.89577	2.8776	3.65	7	3.00235	2.9333	6.25	12	3.00151	2.87308	9.38	18	2.9346	2.90817	2.08	4	2.70288	2.67615	6.77	13	2.91144	2.82266	5.73	11	2.80242	2.79079	5.73	11	2.88205	2.83111	15.63	30	3.08069	3.01849	7.81
903	18	1	0	0	14.06	27	2.92903	2.89951	26.04	50	3.50815	3.2392	39.06	75	3.77829	3.63386	13.54	26	2.85528	2.81003	12.5	24	2.9341	2.92402	22.92	44	3.01531	2.87004	15.1	29	2.76995	2.75552	14.58	28	2.89371	2.82281	19.79	38	3.11672	3.14296	16.67	32	3.16554	3.13328	28.13	54	3.3424	3.31777	22.4
904	21	1	0	0	13.54	26	3.30561	3.22384	15.1	29	3.30031	3.28997	6.25	12	3.02129	2.94423	7.29	14	2.99852	2.96881	9.38	18	3.03315	2.97176	9.9	19	2.96368	2.9498	9.9	19	3.23098	3.31167	12.5	24	3.28897	3.30351	7.81	15	3.16773	3.11395	5.21	10	3.22675	3.22818	4.69	9	3.02199	3.01279	12.5
905	21	1	0	0	5.21	10	3.20571	3.22617	4.17	8	3.33704	3.279	3.65	7	3.42675	3.4536	8.33	16	3.27127	3.26777	5.73	11	3.2119	3.17269	3.65	7	3.23528	3.28109	5.21	10	3.12101	3.07945	5.21	10	2.98463	2.97125	4.17	8	3.1596	3.12491	5.21	10	3.22616	3.23691	4.17	8	3.31061	3.34331	1.56
906	21	1	0	1	1.56	3	2.80315	2.79141	0.52	1	2.69268	2.62309	1.04	2	2.67267	2.61837	0	0	2.6576	2.62738	1.56	3	2.47053	2.46419	2.08	4	2.49547	2.44377	2.08	4	2.7266	2.68129	3.13	6	2.62855	2.5623	2.08	4	2.64345	2.57954	1.04	2	2.59095	2.54107	1.04	2	2.56273	2.4891	1.56
907	21	0	0	1	2.08	4	2.35243	2.3479	3.13	6	2.3305	2.33999	4.17	8	2.07163	2.20146	6.25	12	1.89024	1.97187	3.65	7	2.01109	2.05116	7.29	14	2.23951	2.03688	9.9	19	2.68411	2.63745	19.27	37	3.12671	3.05853	5.73	11	2.5835	2.49667	20.83	40	2.78384	2.69787	25	48	3.07295	3.04123	22.4
908	24	0	0	0	21.88	42	3.71832	3.70238	7.29	14	3.3602	3.41888	7.81	15	3.11343	3.15068	7.29	14	3.02124	3.02832	13.54	26	3.07458	3.07852	4.17	8	2.74248	2.82362	7.29	14	2.95154	2.99243	5.73	11	2.83462	2.83894	9.38	18	2.70549	2.715	4.69	9	2.59796	2.70734	4.69	9	2.6522	2.55322	6.25
909	45	0	0	1	30.21	58	3.31593	3.22852	30.21	58	3.29473	3.30664	20.83	40	3.41473	3.49274	26.04	50	3.54787	3.62268	21.88	42	3.57554	3.59149	12.5	24	3.61978	3.61198	18.23	35	3.66728	3.62014	13.02	25	3.49528	3.5314	15.63	30	3.67462	3.66113	17.19	33	3.55102	3.60639	18.23	35	3.46017	3.46172	17.71
910	22	0	0	0	4.17	8	3.20929	3.11684	3.13	6	3.23225	3.23004	4.17	8	3.23626	3.16986	6.25	12	3.10404	3.02534	5.21	10	2.99331	2.98911	11.98	23	3.66538	3.68096	5.21	10	3.02759	3.04466	10.94	21	3.1606	3.12306	17.71	34	3.58141	3.52085	41.15	79	4.16091	4.15081	2.6	5	2.83227	2.83783	4.69
911	18	1	0	1	6.25	12	3.77327	3.79464	7.29	14	3.59543	3.54773	10.94	21	3.4295	3.39569	8.85	17	3.57012	3.5653	13.02	25	3.46365	3.43874	9.38	18	3.43914	3.41533	10.42	20	3.39072	3.4198	5.73	11	3.51898	3.4631	13.54	26	3.68242	3.57609	10.42	20	3.56223	3.56742	16.15	31	3.607	3.45236	18.75
912	18	2	0	0	5.21	10	3.1286	3.11349	3.13	6	3.15189	3.19001	5.73	11	3.08571	3.06689	6.25	12	3.07942	3.0553	5.73	11	2.99917	3.01056	7.81	15	3.09993	3.17105	9.38	18	3.18143	3.19965	7.81	15	3.20337	3.14496	9.9	19	3.24048	3.26172	7.81	15	3.00422	2.9922	8.33	16	3.06216	3.07	13.54
913	21	1	1	0	9.38	18	3.52611	3.39386	9.9	19	3.71889	3.69707	8.85	17	3.70171	3.64176	9.9	19	3.41008	3.38878	3.13	6	3.37763	3.36823	5.73	11	3.53621	3.4723	5.21	10	3.60366	3.56905	4.17	8	3.64542	3.57809	5.21	10	3.61507	3.58455	8.85	17	3.5986	3.56858	3.65	7	3.48975	3.52362	4.17
914	22	1	0	0	3.13	6	3.0602	3.02495	1.04	2	2.91737	2.93733	2.6	5	2.96076	2.88898	0.52	1	2.95902	2.93794	1.04	2	2.71899	2.71274	1.56	3	2.88098	2.93786	1.56	3	3.07073	3.00514	1.04	2	3.09074	3.10454	0.52	1	2.92966	2.91124	1.56	3	2.79201	2.74338	4.17	8	2.86445	2.91316	4.17
915	18	0	0	1	3.13	6	2.78216	2.70944	4.17	8	2.71753	2.71403	6.25	12	2.81008	2.71117	3.13	6	2.76919	2.80352	4.17	8	2.809	2.71931	4.17	8	2.80559	2.73011	2.08	4	2.72894	2.69506	3.65	7	2.80995	2.83024	3.65	7	2.80138	2.76782	3.65	7	2.87971	2.87209	2.08	4	2.67373	2.70802	2.6
916	20	0	0	1	2.08	4	2.80725	2.78013	3.65	7	2.83492	2.84038	7.29	14	2.93176	2.95849	5.21	10	2.96122	2.96709	5.73	11	2.83066	2.71969	6.77	13	2.79009	2.77632	7.29	14	2.94833	2.96898	7.81	15	3.00588	2.98265	9.38	18	3.07458	2.99724	8.33	16	3.11776	3.02713	8.33	16	2.8278	2.83144	5.21
917	21	1	0	0	2.6	5	2.97861	2.97196	1.04	2	3.08855	3.0751	3.13	6	3.10905	3.10329	3.13	6	3.11046	3.08515	2.6	5	3.05219	3.03868	4.69	9	3.18261	3.22528	2.6	5	3.17072	3.12845	5.73	11	3.18341	3.22003	10.42	20	3.36061	3.25529	4.69	9	3.2878	3.31055	3.65	7	3.24506	3.28422	3.65
918	20	1	0	1	4.69	9	2.66449	2.64907	3.65	7	2.63	2.66084	3.65	7	2.61291	2.58006	6.25	12	2.50684	2.50824	4.69	9	2.45769	2.44213	5.21	10	2.51736	2.49941	6.25	12	2.74599	2.73462	4.69	9	2.70343	2.66581	8.85	17	2.73746	2.73767	5.21	10	2.76296	2.77047	4.69	9	2.57011	2.59811	5.21
919	23	0	0	1	6.77	13	3.55459	3.60297	5.21	10	3.65619	3.71161	5.21	10	3.57082	3.55395	3.65	7	3.57668	3.64047	8.33	16	3.60541	3.56591	5.73	11	3.4458	3.47269	5.73	11	3.35938	3.35863	6.25	12	3.43755	3.42229	11.98	23	3.4893	3.473	7.29	14	3.43015	3.34461	7.29	14	3.47139	3.36261	11.46
920	18	1	0	0	2.08	4	3.15986	3.10264	9.9	19	3.29745	3.2831	18.23	35	3.53284	3.37117	5.73	11	3.26137	3.12011	11.46	22	3.27275	3.10743	15.63	30	3.39987	3.34149	8.85	17	3.08064	3.06591	15.63	30	3.43982	3.37092	22.4	43	3.51698	3.52479	20.83	40	3.61952	3.43485	21.35	41	3.63517	3.56436	18.75
921	21	1	0	0	3.13	6	2.60817	2.57987	5.21	10	2.55328	2.51153	5.21	10	2.48987	2.55131	2.08	4	2.49381	2.48658	3.13	6	2.48169	2.46039	3.65	7	2.44521	2.42428	5.21	10	2.34966	2.35913	3.13	6	2.33188	2.33564	5.73	11	2.3783	2.37985	4.17	8	2.26715	2.26236	4.17	8	2.36089	2.38545	5.73
922	21	1	0	0	5.73	11	3.30022	3.34346	0	0	2.89831	2.88415	2.6	5	2.91313	2.94787	4.69	9	3.1132	3.09163	8.33	16	3.1523	3.05418	8.33	16	3.16856	3.20823	10.42	20	3.32277	3.23624	8.85	17	3.29357	3.27667	7.81	15	3.23999	3.21905	12.5	24	3.31523	3.31	10.42	20	3.39867	3.34616	8.85
923	18	1	0	1	3.13	6	2.61892	2.61225	5.21	10	2.74287	2.71743	2.6	5	2.65001	2.56308	3.13	6	2.62259	2.57826	4.69	9	2.66566	2.65053	3.65	7	2.64733	2.64554	2.6	5	2.54516	2.55403	5.73	11	2.77318	2.80736	6.25	12	2.6584	2.56174	4.17	8	2.55531	2.50309	6.77	13	2.49417	2.44006	5.73
924	25	0	0	0	7.29	14	2.98384	2.87949	7.29	14	3.21567	3.16566	8.33	16	3.27678	3.2727	9.38	18	3.38362	3.26392	9.9	19	3.2207	3.24205	15.63	30	3.29776	3.1544	2.6	5	3.20671	3.2642	5.21	10	3.26098	3.24477	4.17	8	3.28736	3.28067	4.69	9	3.38555	3.30426	7.81	15	3.25839	3.18853	4.17
925	19	0	0	1	2.6	5	2.91618	2.91775	3.13	6	2.89753	2.87204	3.65	7	2.86511	2.85514	6.77	13	2.6707	2.66159	5.21	10	2.63544	2.64082	7.29	14	2.38519	2.32104	7.81	15	2.44392	2.45801	11.46	22	2.6069	2.51084	6.77	13	2.63145	2.6278	10.42	20	2.5838	2.63588	6.77	13	2.74726	2.70856	8.33
926	20	0	0	1	4.69	9	2.53849	2.51415	3.65	7	2.52977	2.5033	4.17	8	2.52929	2.511	1.04	2	2.55565	2.54133	1.04	2	2.61032	2.67847	3.65	7	2.42848	2.4294	2.6	5	2.45056	2.40171	4.17	8	2.44347	2.44131	5.21	10	2.54849	2.49775	2.6	5	2.39883	2.3126	2.6	5	2.40048	2.34537	5.73
927	34	1	0	0	1.56	3	3.8294	3.8225	2.6	5	3.79825	3.80907	5.73	11	3.84464	3.78917	1.56	3	3.70515	3.66818	3.13	6	3.829	3.83451	2.6	5	3.78014	3.73538	1.04	2	3.54125	3.56631	2.6	5	3.58794	3.58924	3.13	6	3.64009	3.59635	5.73	11	3.60935	3.56835	4.69	9	3.84776	3.80843	5.73
928	22	1	0	1	3.65	7	2.62828	2.64179	4.17	8	2.66279	2.58979	2.6	5	2.68156	2.64538	2.6	5	2.80345	2.80647	3.13	6	2.92393	2.86833	2.6	5	2.80405	2.76654	3.13	6	2.84981	2.85601	1.04	2	2.73391	2.66248	6.25	12	2.83454	2.77568	4.69	9	2.88588	2.85756	5.21	10	2.92011	2.91096	4.17
929	18	1	0	1	3.65	7	2.77376	2.78039	1.56	3	2.81776	2.78457	2.6	5	2.87932	2.84369	2.6	5	2.7502	2.75114	4.17	8	2.92288	2.83883	3.13	6	2.79519	2.80503	2.08	4	2.69578	2.68443	7.29	14	2.9262	2.82662	2.6	5	2.83023	2.81582	5.21	10	2.7851	2.76861	4.17	8	2.842	2.79643	5.73
930	25	1	0	0	3.65	7	2.96975	2.99394	7.29	14	3.10143	3.0463	5.21	10	3.30411	3.25447	4.69	9	3.07642	3.04188	4.17	8	3.09568	3.08865	4.17	8	3.01867	3.03193	96.35	185	3.6095	3.46991	6.77	13	3.13965	3.10867	4.69	9	3.07221	3.08636	7.81	15	3.19227	3.18599	9.38	18	3.28862	3.213	5.73
931	21	1	0	0	5.73	11	2.44818	2.4543	5.73	11	2.36739	2.33331	3.65	7	2.32124	2.3468	4.17	8	2.3691	2.31888	6.25	12	2.21118	2.2149	3.65	7	1.95926	1.91409	3.65	7	2.69316	2.69043	5.21	10	2.34481	2.35287	7.29	14	2.32588	2.30473	5.73	11	2.10371	2.0846	5.73	11	2.07018	2.109	4.69
932	18	1	0	1	5.21	10	3.06616	2.91897	2.6	5	2.80808	2.79807	4.17	8	2.95093	2.8371	4.69	9	2.782	2.74456	4.17	8	2.61975	2.60823	4.69	9	2.522	2.52031	4.69	9	2.71482	2.69016	4.69	9	2.70441	2.66764	4.17	8	2.64936	2.61107	5.21	10	2.57992	2.52142	4.17	8	2.573	2.56632	4.69
933	21	1	0	0	15.63	30	3.46534	3.50615	18.23	35	3.68168	3.71335	26.56	51	3.66193	3.77072	18.75	36	3.70942	3.70348	15.63	30	3.68959	3.65797	22.92	44	3.69676	3.66707	14.06	27	3.47816	3.5778	16.15	31	3.60572	3.63483	21.35	41	3.44853	3.46341	20.83	40	3.60946	3.58331	31.25	60	3.57633	3.66159	29.17
934	33	0	0	0	1.56	3	2.56185	2.59948	2.08	4	2.76997	2.76291	0.52	1	2.92155	2.88879	0.52	1	2.95504	2.94029	1.56	3	3.09316	3.06906	1.04	2	3.07488	3.06895	0.52	1	3.17295	3.16167	2.08	4	3.24557	3.21652	0.52	1	3.18135	3.20321	4.17	8	3.38051	3.36103	3.65	7	3.26038	3.1571	5.73
935	20	1	0	1	5.21	10	2.61027	2.63156	6.25	12	2.73389	2.74888	6.25	12	2.77437	2.74267	5.21	10	2.75282	2.75324	5.21	10	2.57113	2.58376	10.42	20	2.50899	2.47101	6.25	12	2.78733	2.76114	14.06	27	2.59784	2.55985	6.25	12	2.62982	2.64827	9.9	19	2.51955	2.51595	9.9	19	2.30107	2.28731	13.02
936	21	1	0	0	5.21	10	3.36114	3.31685	3.13	6	3.42088	3.43094	2.08	4	3.23848	3.15192	6.77	13	3.31658	3.21142	3.13	6	3.11217	3.04057	4.17	8	3.27675	3.21151	6.77	13	3.35016	3.4327	8.85	17	3.76786	3.68988	10.94	21	3.51687	3.53095	3.13	6	3.38061	3.35109	11.46	22	3.444	3.37283	12.5
937	21	1	1	0	5.21	10	2.81523	2.77157	3.65	7	2.98034	3.0032	6.25	12	3.04683	3.04913	4.69	9	2.84093	2.84818	7.81	15	2.70264	2.68962	5.21	10	2.76133	2.7594	6.25	12	2.74288	2.74584	4.69	9	2.848	2.82055	7.29	14	2.79262	2.7725	6.25	12	2.78628	2.80196	5.21	10	2.73222	2.69622	8.85
938	25	0	0	1	4.17	8	2.89775	2.88526	4.17	8	2.83819	2.78705	4.69	9	2.86603	2.86084	6.25	12	2.84108	2.88078	7.29	14	2.67226	2.7228	4.69	9	2.79066	2.74198	3.13	6	2.94777	2.99177	4.17	8	3.00717	3.0021	6.77	13	3.04168	3.0595	4.69	9	3.00479	2.99939	5.21	10	2.96179	2.93611	5.21
939	27	1	1	1	2.6	5	3.04271	2.95066	1.04	2	2.8875	2.85932	3.13	6	2.95371	2.90255	3.65	7	3.13733	3.01392	2.6	5	2.96582	2.96343	6.77	13	3.02924	3.04798	2.6	5	2.85474	2.85412	1.56	3	2.94984	2.95461	2.6	5	2.95574	3.00339	1.04	2	2.97446	3.00235	2.6	5	2.97832	2.99209	2.6
940	20	0	0	0	5.73	11	2.97149	2.95822	6.77	13	2.9418	2.79145	10.42	20	2.90791	2.90421	7.81	15	2.82122	2.71284	4.69	9	2.77372	2.72038	8.33	16	2.63197	2.60733	13.02	25	2.70607	2.67834	9.9	19	2.75307	2.7144	10.94	21	2.85363	2.76923	10.94	21	2.85883	2.79116	13.54	26	2.8084	2.71191	14.58
941	18	1	0	0	10.42	20	3.50697	3.42713	14.06	27	3.60913	3.5188	11.46	22	3.37987	3.30167	13.02	25	3.39512	3.23183	12.5	24	3.18479	3.28328	14.58	28	3.1452	3.01867	15.63	30	3.15015	3.13368	20.31	39	3.26245	3.27185	18.75	36	3.13835	3.03538	19.27	37	3.18205	2.97393	14.06	27	2.9037	2.93227	15.1
942	21	0	0	1	7.29	14	2.8007	2.73652	8.33	16	2.84056	2.83302	8.85	17	2.6115	2.61249	8.85	17	2.66894	2.66298	9.9	19	2.50048	2.51203	6.77	13	2.61428	2.54668	4.69	9	2.63557	2.62384	7.29	14	2.64963	2.56805	6.77	13	2.68905	2.68032	6.77	13	2.72266	2.7018	7.29	14	2.6499	2.67965	5.73
943	20	0	2	1	4.17	8	3.62295	3.71714	8.85	17	3.54229	3.51966	5.21	10	3.42191	3.37578	5.21	10	3.29895	3.27	4.17	8	3.17764	3.14029	5.73	11	3.19277	3.10997	5.21	10	3.12431	3.12882	3.65	7	3.31202	3.28911	4.69	9	3.20774	3.13454	3.65	7	3.25243	3.2348	3.65	7	3.25325	3.2598	6.25
944	19	1	0	0	1.56	3	2.88404	2.85216	2.6	5	3.00522	2.98168	4.17	8	2.84451	2.84966	4.69	9	2.9217	2.82111	7.81	15	2.91483	2.90073	5.73	11	2.83981	2.81091	3.65	7	2.83181	2.83301	4.69	9	2.91222	2.83695	4.69	9	2.63386	2.60645	6.25	12	2.72216	2.69571	5.73	11	2.75958	2.77417	8.85
945	19	0	0	0	3.65	7	3.01662	3.02378	6.25	12	3.27873	3.24727	4.69	9	3.21475	3.18352	7.29	14	3.05934	2.99826	10.94	21	3.24339	3.20307	4.69	9	3.17106	3.04234	11.98	23	3.24926	3.16406	10.94	21	3.53181	3.25156	16.15	31	3.4333	3.45671	13.54	26	3.53051	3.32765	14.06	27	3.37021	3.24704	16.67
946	19	1	0	1	3.13	6	2.57658	2.56163	3.65	7	2.64926	2.60816	2.08	4	2.59425	2.56097	3.13	6	2.54909	2.57273	3.13	6	2.61383	2.64257	2.08	4	2.61731	2.6643	4.69	9	2.70693	2.77271	3.13	6	2.6305	2.58122	2.6	5	2.62634	2.57823	4.17	8	2.64745	2.66257	5.73	11	2.54919	2.56653	4.69
947	27	1	0	1	2.08	4	3.12925	3.14405	4.69	9	3.21042	3.15423	2.08	4	3.14483	3.09369	4.17	8	3.13556	3.1336	5.21	10	3.09455	3.02208	2.08	4	3.08941	3.06185	3.13	6	2.91421	2.85653	1.56	3	2.88669	2.85777	2.6	5	3.12852	3.17344	1.56	3	3.07113	3.06673	2.6	5	3.10566	3.08099	3.13
948	19	0	0	0	6.25	12	3.29954	3.29597	1.56	3	3.27183	3.26731	4.17	8	3.25273	3.22359	0.52	1	3.06884	3.11687	2.08	4	3.0899	3.11381	2.08	4	3.0436	3.02472	3.65	7	2.98411	2.98749	3.65	7	3.01161	3.00198	5.21	10	3.06576	3.05489	4.69	9	3.09915	3.11272	3.65	7	2.92862	2.94357	2.6
949	20	0	1	0	0	0	2.97461	2.92775	1.04	2	3.02438	2.98831	4.17	8	3.19405	3.13842	1.04	2	2.88404	2.84482	3.65	7	2.83316	2.8307	2.6	5	2.77147	2.7794	2.08	4	2.84209	2.82519	5.21	10	2.63388	2.62949	4.69	9	2.68929	2.60635	3.13	6	2.61626	2.56267	6.25	12	2.63624	2.61733	1.56
950	19	1	0	1	4.17	8	2.70168	2.66806	7.29	14	2.69234	2.73046	5.73	11	2.70744	2.69737	3.13	6	2.67991	2.72678	5.21	10	2.63818	2.68918	6.25	12	2.61417	2.61661	4.17	8	2.79629	2.75872	7.29	14	2.90377	2.81387	7.29	14	2.93876	2.88127	7.29	14	2.88898	2.85006	8.85	17	2.8645	2.80216	4.69
951	19	1	0	1	3.13	6	2.54625	2.54829	2.6	5	2.61689	2.57555	1.56	3	2.82771	2.87142	1.56	3	2.78009	2.79376	5.21	10	2.71111	2.7366	3.13	6	2.63395	2.60392	5.21	10	2.72406	2.71299	7.29	14	2.81791	2.81683	5.21	10	2.74516	2.68441	7.81	15	2.64289	2.60134	8.33	16	2.71909	2.64725	5.21
952	19	0	0	1	1.56	3	2.97368	2.92579	4.17	8	3.10059	3.14002	3.13	6	3.01491	2.95224	6.25	12	2.8301	2.75337	2.6	5	2.79231	2.739	5.21	10	2.83881	2.78379	2.6	5	2.88117	2.80731	8.85	17	3.21729	3.07312	3.65	7	2.82118	2.7699	9.38	18	3.06211	3.05625	5.73	11	2.74758	2.70937	3.65
953	18	1	0	0	3.13	6	2.94462	2.92402	7.81	15	3.01474	2.97709	6.77	13	2.91976	2.93988	10.42	20	2.82609	2.77785	8.33	16	2.63774	2.70266	9.38	18	2.64771	2.70458	9.38	18	2.89801	2.87003	11.98	23	2.6528	2.60298	8.85	17	2.67241	2.63463	10.94	21	2.57425	2.61574	9.9	19	2.45573	2.49338	9.38
954	20	0	0	2	2.08	4	3.31492	3.2542	5.73	11	3.43514	3.42014	5.21	10	3.4582	3.40516	9.9	19	3.29391	3.29883	3.65	7	3.14224	3.12255	3.65	7	3.09965	2.98621	4.69	9	3.33247	3.28006	5.21	10	3.35998	3.29455	5.73	11	3.24675	3.22983	6.77	13	3.17721	3.06434	4.69	9	3.08994	3.08089	7.29
955	19	0	2	2	2.08	4	2.49045	2.42812	2.08	4	2.47492	2.4697	2.08	4	2.58022	2.51865	2.6	5	2.70463	2.7443	8.33	16	2.58424	2.54065	4.17	8	2.71363	2.63187	5.73	11	2.74617	2.73315	11.46	22	2.78754	2.75898	10.42	20	2.95618	2.87411	11.46	22	2.98357	3.03125	10.42	20	3.00548	3.05063	6.77
956	18	1	0	2	2.6	5	3.21337	3.20478	3.13	6	3.06037	3.00598	0.52	1	3.13793	3.10386	1.56	3	3.06811	3.07021	0.52	1	3.0287	2.97804	0	0	2.96743	2.90809	2.6	5	2.96053	2.90573	1.56	3	2.87526	2.87142	4.17	8	2.8153	2.81843	2.6	5	2.90222	2.8737	1.56	3	2.78354	2.77186	1.04
958	19	1	0	1	3.65	7	2.63591	2.6511	4.69	9	2.50591	2.52709	4.69	9	2.48014	2.47692	3.65	7	2.35796	2.33593	8.85	17	1.91041	1.91265	5.21	10	1.83512	1.868	5.21	10	2.62805	2.64241	7.29	14	2.37944	2.47937	6.25	12	2.36188	2.39658	4.17	8	2.15719	2.41448	6.25	12	1.78432	1.99548	6.25
959	21	1	2	0	2.08	4	2.83162	2.85411	4.17	8	2.81741	2.79214	4.17	8	2.56702	2.6244	3.13	6	2.49006	2.46696	3.65	7	2.4767	2.45006	2.6	5	2.42195	2.40739	3.13	6	2.46999	2.49359	6.77	13	2.45612	2.39276	4.17	8	2.3922	2.41413	2.08	4	2.52438	2.53732	6.25	12	2.38139	2.4271	5.21
960	19	1	0	0	11.46	22	3.42002	3.3483	6.77	13	3.59221	3.56032	5.21	10	3.59782	3.53071	5.21	10	3.51354	3.5142	3.13	6	3.34666	3.28522	3.65	7	3.30209	3.24193	5.73	11	3.0746	3.0999	4.17	8	3.33618	3.32094	6.25	12	3.39495	3.41937	3.65	7	3.27916	3.21865	3.65	7	3.2036	3.19772	7.81
961	19	1	1	2	25	48	4.12829	4.0694	31.25	60	4.13568	4.07236	8.85	17	3.72707	3.66808	4.69	9	3.60443	3.57427	3.13	6	3.64116	3.59703	13.02	25	3.7118	3.6884	2.6	5	3.25776	3.27316	8.33	16	3.39084	3.3589	3.13	6	3.26579	3.22065	5.73	11	3.31892	3.31695	7.29	14	3.21186	3.18249	5.21
962	24	0	0	2	1.56	3	2.91341	2.89182	0.52	1	2.7508	2.72985	0.52	1	2.91017	2.87179	0	0	2.85906	2.87943	1.56	3	2.66728	2.65882	0.52	1	2.74606	2.72989	0.52	1	3.13821	3.11849	2.08	4	3.0211	2.90829	0.52	1	3.00896	2.99481	1.56	3	2.96475	2.96287	0	0	2.93035	2.89594	0
963	24	0	0	2	3.13	6	3.39957	3.39292	7.81	15	3.85981	3.79761	5.73	11	3.60773	3.56825	15.63	30	3.84722	3.87084	8.85	17	3.941	3.91673	24.48	47	3.86213	3.74601	13.02	25	3.6338	3.56267	19.79	38	4.00886	4.01674	25.52	49	3.90655	3.6166	40.1	77	4.06942	4.02573	26.56	51	4.02741	3.81254	38.54
964	21	0	1	2	2.6	5	2.82901	2.72595	4.17	8	2.9645	2.90487	5.21	10	2.81729	2.73612	6.77	13	2.78957	2.77338	4.69	9	2.54651	2.53429	3.13	6	2.42384	2.37283	3.13	6	2.88355	2.87618	6.25	12	2.79514	2.74221	3.65	7	2.72507	2.63792	3.13	6	2.61361	2.63239	4.69	9	2.49555	2.43775	7.81
965	22	0	0	2	0.52	1	2.36614	2.37075	1.04	2	2.49487	2.46512	1.56	3	2.6892	2.70137	0	0	2.62368	2.61166	0.52	1	2.5775	2.57098	1.04	2	2.77274	2.74801	0	0	2.74406	2.69706	0.52	1	2.71244	2.6957	0.52	1	2.74897	2.7401	0.52	1	2.60608	2.58349	0	0	2.60928	2.54927	1.04
966	19	1	0	2	4.69	9	2.7921	2.76977	2.08	4	2.95384	2.90701	6.25	12	3.04423	3.06614	6.25	12	3.04572	3.06891	4.69	9	3.15149	3.14429	4.17	8	3.12698	3.09736	3.13	6	3.04413	3.02149	3.13	6	2.89457	2.90578	2.6	5	2.8984	2.87179	9.38	18	3.04422	3.10567	6.25	12	2.89436	2.89114	3.13
967	21	0	0	2	3.65	7	2.93858	2.98937	4.69	9	2.98317	2.94166	3.13	6	2.88173	2.87681	4.17	8	2.90372	2.87457	4.17	8	2.7814	2.82414	3.13	6	2.85412	2.79085	3.65	7	2.82206	2.76476	4.69	9	2.80696	2.76051	4.69	9	2.79615	2.78326	4.69	9	2.83584	2.74116	4.69	9	2.80879	2.75233	4.69
968	40	0	0	2	8.33	16	2.9178	2.91623	2.6	5	2.93617	2.93421	9.9	19	3.01645	2.96028	4.69	9	2.92669	2.87543	5.21	10	2.73324	2.67598	6.77	13	2.47503	2.4527	7.29	14	2.54492	2.58476	5.21	10	2.5862	2.56475	6.25	12	2.50747	2.50343	3.65	7	2.55495	2.54207	5.73	11	2.37381	2.34816	7.81
969	19	0	0	2	2.08	4	2.54742	2.55431	3.13	6	2.61403	2.59292	4.69	9	2.57031	2.57398	8.33	16	2.65787	2.69593	5.73	11	2.74006	2.71553	5.73	11	2.62809	2.57861	7.81	15	2.57538	2.58967	9.38	18	2.74661	2.75557	6.77	13	2.77522	2.71079	9.38	18	2.7633	2.75783	12.5	24	2.84558	2.72444	8.33
970	20	0	0	2	3.13	6	2.81988	2.80554	4.17	8	2.81511	2.79837	4.69	9	2.73492	2.6973	5.73	11	2.78648	2.71937	6.25	12	2.84455	2.7833	7.29	14	2.82241	2.81227	6.77	13	2.6774	2.64442	7.29	14	2.74299	2.61996	6.25	12	2.7151	2.63519	7.81	15	2.74582	2.72006	5.73	11	2.76344	2.73065	8.33
971	20	0	1	2	3.65	7	2.73958	2.68756	1.56	3	2.95333	2.88547	2.08	4	2.70109	2.67984	1.56	3	3.04421	3.0552	2.08	4	2.94079	2.98717	0.52	1	2.77932	2.82376	3.13	6	3.0578	3.00555	1.04	2	2.95709	2.95366	2.08	4	2.8192	2.80691	2.6	5	2.72821	2.78187	1.56	3	2.89778	2.8542	1.56
972	20	1	0	2	11.46	22	3.44903	3.44251	21.88	42	3.71513	3.67526	10.94	21	3.55818	3.56341	5.73	11	3.67362	3.60512	12.5	24	3.78164	3.805	14.06	27	3.60036	3.62296	11.46	22	3.64	3.61971	9.9	19	3.83464	3.82664	7.81	15	3.74204	3.72608	16.15	31	3.68867	3.58186	20.31	39	3.86286	3.88621	23.44
973	19	1	0	2	9.38	18	2.61253	2.56931	5.73	11	2.82214	2.72593	10.94	21	2.85575	2.72418	11.98	23	2.7943	2.77549	4.17	8	2.54975	2.55338	4.69	9	2.62084	2.58656	8.33	16	2.46961	2.44185	6.77	13	2.69317	2.63667	5.73	11	3.0063	2.91147	6.25	12	2.57327	2.52639	6.77	13	2.529	2.49217	4.17
974	18	0	0	2	3.13	6	2.82393	2.78434	5.73	11	2.92888	2.9927	7.81	15	3.06933	3.01788	6.77	13	3.14321	3.11291	6.25	12	2.99195	2.97252	6.25	12	3.17392	3.17336	3.13	6	2.75403	2.77389	4.17	8	2.83345	2.80872	3.13	6	2.81706	2.80515	7.29	14	3.00394	2.98456	9.38	18	3.4515	3.47116	3.65
975	22	0	0	2	2.6	5	2.92848	2.90808	3.13	6	3.17804	3.0715	3.13	6	2.83529	2.79268	2.08	4	3.10771	3.10569	3.65	7	2.98232	2.93138	1.04	2	2.89001	2.88403	3.13	6	2.897	2.83052	4.17	8	2.91927	2.85396	3.13	6	2.92736	2.83954	1.56	3	2.9969	2.92566	0	0	2.83217	2.83275	2.08
976	19	1	0	2	5.21	10	3.46315	3.40735	4.69	9	3.34739	3.4193	2.08	4	3.23956	3.22671	3.65	7	3.31835	3.35264	4.69	9	3.10804	3.07991	4.69	9	2.99879	2.95818	2.6	5	2.97198	3.00316	3.13	6	3.04083	3.00917	5.21	10	3.15914	3.05926	6.25	12	3.26756	3.19157	5.73	11	3.14129	3.2137	5.21
977	20	0	0	2	3.65	7	3.5085	3.48807	9.38	18	3.69575	3.64767	8.33	16	3.4584	3.49472	7.29	14	3.36317	3.43349	4.69	9	3.25049	3.22894	3.65	7	3.14219	3.12366	6.25	12	3.23141	3.23041	6.25	12	3.16577	3.12194	6.25	12	3.21621	3.20362	5.73	11	3.08096	3.08084	7.29	14	3.13196	3.10748	2.08
978	19	1	0	2	18.23	35	3.50745	3.5159	21.88	42	3.27743	3.27276	21.35	41	3.49022	3.49182	24.48	47	3.49614	3.4633	18.23	35	3.41527	3.48553	18.23	35	3.29236	3.37912	22.92	44	3.45015	3.46753	20.31	39	3.41862	3.37815	91.15	175	3.26489	3.18613	40.63	78	3.26482	3.21588	15.1	29	3.31825	3.27018	10.94
979	19	0	1	2	3.65	7	2.72242	2.71779	4.17	8	2.85576	2.84212	4.69	9	2.77959	2.7291	8.85	17	2.89624	2.85473	3.65	7	2.71467	2.65709	1.56	3	2.71063	2.71467	5.21	10	2.60396	2.5753	4.69	9	2.63478	2.59165	3.65	7	2.64726	2.61241	1.04	2	2.66553	2.65507	5.21	10	2.55352	2.51756	4.17
981	19	1	0	2	6.77	13	3.29581	3.23752	4.17	8	3.20992	3.20004	4.69	9	3.05814	3.00944	4.17	8	3.0724	3.05362	3.13	6	3.01211	2.9555	4.69	9	3.04943	3.05201	4.69	9	2.90186	2.85138	7.81	15	2.95034	2.8516	3.65	7	2.86117	2.84945	4.17	8	2.92476	2.88523	6.77	13	2.84576	2.8571	1.56
982	19	1	1	2	0.52	1	2.81467	2.77868	3.13	6	2.83012	2.8117	3.13	6	2.78975	2.73088	3.13	6	2.81025	2.82577	7.29	14	2.7653	2.75973	4.17	8	2.67385	2.6576	3.65	7	2.63022	2.60973	3.65	7	2.74725	2.73567	6.25	12	2.786	2.6863	6.25	12	2.68659	2.67321	1.56	3	2.72063	2.64401	5.73
983	19	0	1	2	11.98	23	2.96432	2.95194	12.5	24	3.0046	3.03493	12.5	24	2.96376	2.9552	12.5	24	3.04764	3.05603	11.46	22	3.06907	3.08175	9.38	18	3.02299	2.99325	8.33	16	2.79259	2.76339	11.98	23	2.8832	2.84212	9.38	18	2.87955	2.83895	10.42	20	3.04411	3.05822	10.94	21	3.10623	3.06944	14.58
984	20	0	0	2	2.08	4	2.82832	2.84574	0.52	1	2.80861	2.78017	1.04	2	2.80509	2.8014	1.56	3	2.83605	2.77318	0	0	3.3008	3.29241	1.56	3	2.80508	2.75752	1.56	3	2.9894	2.95561	1.56	3	2.90477	2.93398	1.56	3	2.86879	2.84316	2.08	4	2.83477	2.76188	2.08	4	2.987	2.9472	3.13
[truncated: 15 more columns]

## Sheet: Study2
Shimizu et al., "The impact of cerebellar transcranial direct current stimulation (tDCS) on learning fine-motor sequences", doi: 10.1098/rstb.2016.0050; Study 2 data
Notes: The following subjects were excluded as described in the manuscript: 818 (dizzy during ramp up), 822 (didn't complete study); 815, 817 (accuracy criteria). The normalized RTs were calculated with the median RTs.
Gender: 0 = man, 1 = woman, 2 = decline to state; Handedness: 0 = RH, 1 = LH, 2 = ambidextrous; tDCS condition: 0 = sham, 1 = anode, 2 = cathode
SubjectID	Age	Gender	Handedness	tDCS condition	P1 % errors	P1 # errors	P1 mean RT	P1 median RT	P2 % errors	P2 # errors	P2 mean RT	P2 median RT	P3 % errors	P3 # errors	P3 mean RT	P3 median RT	P4 % errors	P4# errors	P4 mean RT	P4 median RT	P5 % errors	P5 # errors	P5 mean RT	P5 median RT	P6 % errors	P6 # errors	P6 mean RT	P6 median RT	T1 % errors	T1 # errors	T1 mean RT	T1 median RT	T2 % errors	T2 # errors	T2 mean RT	T2 median RT	T3 % errors	T3 # errors	T3 mean RT	T3 median RT	T4 % errors	T4# errors	T4 mean RT	T4 median RT	T5 % errors	T5 # errors	T5 mean RT	T5 median RT	T6 % errors
801	19	1	0	0	2.6	5	3.00854	2.93015	1.56	3	2.89964	2.91969	2.08	4	2.77733	2.77994	2.08	4	2.70496	2.70028	3.65	7	2.66608	2.61962	1.56	3	2.67505	2.71673	2.6	5	2.77184	2.74331	1.5625	3	2.68134	2.58773	4.16667	8	2.66579	2.652	3.65	7	2.64226	2.60037	1.56	3	2.59123	2.5643	3.13
802	19	0	1	0	2.08	4	2.61841	2.55809	4.17	8	2.6979	2.65635	3.65	7	2.72386	2.72303	4.17	8	2.63264	2.6264	5.73	11	2.73828	2.65742	2.08	4	2.67812	2.66536	3.65	7	2.72494	2.72982	1.5625	3	2.69839	2.6612	3.64583	7	2.79369	2.7117	4.17	8	2.58906	2.58042	5.21	10	2.60703	2.63817	5.21
803	19	1	0	1	3.65	7	2.76048	2.74497	10.42	20	2.75906	2.75181	12.5	24	2.90472	2.88277	6.25	12	3.0388	3.07062	9.38	18	2.58673	2.62433	5.21	10	2.73551	2.75057	6.77	13	2.55029	2.51159	2.60417	5	2.59015	2.63276	5.20833	10	2.50106	2.49863	5.21	10	2.48187	2.49282	4.69	9	2.64902	2.64951	4.17
804	20	0	0	1	3.65	7	3.1572	3.162	2.08	4	2.93022	2.93162	0.52	1	3.10982	3.15776	4.69	9	3.25358	3.28882	4.17	8	2.96431	2.85667	5.73	11	2.88886	2.84959	0.52	1	2.92715	2.88908	3.125	6	2.74305	2.72905	3.64583	7	2.77374	2.78354	3.13	6	2.73989	2.74286	3.13	6	2.77675	2.72929	2.6
805	21	1	0	1	0.52	1	2.27243	2.26231	2.6	5	2.25167	2.1763	3.65	7	2.37351	2.3427	4.69	9	2.47695	2.41534	6.25	12	2.37969	2.35923	6.77	13	2.55127	2.53321	0.52	1	2.18117	2.15565	2.08333	4	2.25968	2.23249	2.60417	5	2.223	2.17664	2.6	5	2.35692	2.30932	2.08	4	2.18506	2.15773	2.6
806	19	0	0	0	1.56	3	2.43454	2.43491	5.21	10	2.59163	2.56966	5.21	10	2.6999	2.70321	3.65	7	2.37337	2.39822	4.17	8	2.35732	2.39364	5.73	11	2.61448	2.59669	3.13	6	2.36515	2.3515	1.04167	2	2.33258	2.29521	6.25	12	2.19672	2.18791	2.08	4	2.38689	2.39271	2.6	5	2.28093	2.23225	2.6
807	19	0	0	1	5.21	10	2.62837	2.61131	5.73	11	2.69732	2.64398	8.85	17	2.83349	2.75514	8.85	17	2.92235	2.8186	6.77	13	2.92477	2.8024	10.42	20	2.72307	2.64874	6.25	12	2.56766	2.50912	5.72917	11	2.42004	2.42034	4.16667	8	2.04757	2.14666	8.33	16	1.90235	1.86486	5.73	11	1.88551	1.85364	4.17
808	19	1	0	1	4.17	8	2.97453	2.95181	2.6	5	3.23712	3.24523	3.65	7	3.23107	3.16281	2.08	4	3.12401	3.11279	4.69	9	3.17041	3.18219	3.13	6	3.05369	3.11928	1.56	3	3.01531	3.00718	0.520833	1	3.00808	2.97892	1.04167	2	3.11248	3.06805	5.21	10	3.08721	3.01241	0.52	1	3.15703	3.19845	3.13
809	20	0	0	1	3.13	6	2.57936	2.57837	5.21	10	2.69608	2.65943	5.21	10	2.80266	2.78031	4.69	9	2.90193	2.89744	4.69	9	2.94763	2.9158	1.56	3	2.75809	2.7438	2.08	4	2.61606	2.59891	0.520833	1	2.85378	2.78297	3.64583	7	2.66539	2.63596	3.65	7	2.79135	2.7878	2.6	5	2.84957	2.75512	5.21
810	22	0	0	0	1.56	3	2.81338	2.82914	6.25	12	2.73901	2.78591	1.56	3	2.92955	2.94437	2.6	5	2.83644	2.82413	3.65	7	2.74537	2.67249	5.21	10	2.82592	2.81767	1.56	3	2.67584	2.67083	3.125	6	2.79449	2.75168	0.520833	1	2.79335	2.83122	4.69	9	2.69824	2.67072	3.65	7	2.63442	2.59861	4.69
811	18	1	0	1	3.65	7	3.06192	3.05729	4.17	8	2.94187	2.92522	2.6	5	2.97597	2.99838	6.25	12	3.02208	3.00779	3.65	7	2.87619	2.8487	7.81	15	2.92978	2.8803	4.17	8	2.57957	2.57262	6.25	12	2.78999	2.78625	4.6875	9	2.71179	2.73449	4.69	9	2.66634	2.64053	4.69	9	2.60585	2.7235	2.08
812	21	1	0	1	2.6	5	3.06388	3.07282	2.6	5	3.05605	3.02488	4.17	8	3.19535	3.20032	2.6	5	2.96256	2.97888	3.13	6	2.96455	2.88483	2.6	5	3.00526	3.07997	2.08	4	2.75461	2.75396	2.60417	5	2.7811	2.79387	0.520833	1	2.79332	2.74811	2.08	4	2.793	2.84502	1.56	3	2.76981	2.77433	2.08
813	23	1	0	0	2.08	4	2.41029	2.41853	1.04	2	2.44591	2.43949	2.08	4	2.48701	2.47943	3.13	6	2.59505	2.60631	3.13	6	2.52427	2.50644	1.56	3	2.59378	2.58514	1.56	3	2.3106	2.2978	2.08333	4	2.45954	2.45387	4.16667	8	2.44098	2.38925	2.08	4	2.44824	2.44312	1.04	2	2.42251	2.41828	0.52
814	21	0	0	0	2.08	4	2.69292	2.71151	4.17	8	2.6111	2.57444	3.13	6	2.56104	2.55282	4.69	9	2.55099	2.49771	4.17	8	2.6376	2.67373	4.17	8	2.62301	2.62732	3.13	6	2.49582	2.489	3.125	6	2.41712	2.35509	6.25	12	2.33442	2.36029	5.73	11	2.46794	2.48739	3.65	7	2.45918	2.46491	2.08
815	18	0	0	0	18.75	36	3.84743	3.88843	6.77	13	3.69633	3.72177	26.56	51	3.60333	3.54205	5.21	10	3.61578	3.51233	5.21	10	3.45702	3.46971	5.21	10	3.20569	3.21614	4.17	8	3.04478	2.97457	6.77083	13	3.07271	3.01464	6.25	12	3.00532	2.95143	2.6	5	2.90967	2.91912	7.29	14	2.84729	2.79009	8.33
816	21	1	0	1	2.6	5	3.14098	3.11307	0.52	1	2.9737	2.97256	4.17	8	2.91087	2.82843	2.6	5	2.68162	2.71977	3.65	7	2.9208	2.83555	6.25	12	2.77251	2.77694	5.21	10	2.65817	2.68524	7.8125	15	2.69197	2.68949	6.25	12	2.77406	2.77887	2.6	5	2.95486	2.95824	5.73	11	2.787	2.76438	6.25
817	21	1	0	0	13.54	26	3.63964	3.60103	11.98	23	3.74257	3.71873	14.06	27	3.70545	3.73042	13.02	25	3.6892	3.64196	11.46	22	3.77144	3.70482	9.9	19	3.52472	3.61934	4.17	8	2.90398	2.87563	3.125	6	3.13471	3.13272	3.125	6	3.03872	3.07218	0.52	1	3.07266	3.03956	3.13	6	3.08837	3.11672	5.21
818	26	0	0	0
819	20	1	0	0	3.13	6	2.77603	2.80386	5.73	11	2.83776	2.80617	5.21	10	2.7617	2.65599	7.29	14	2.87701	2.89121	3.65	7	2.82011	2.844	4.17	8	2.85317	2.83575	4.17	8	2.67904	2.63564	4.16667	8	2.7216	2.74133	6.77083	13	2.69825	2.65296	2.6	5	2.74594	2.73795	3.13	6	2.68879	2.6701	5.73
820	19	0	0	0	1.04	2	2.31121	2.31529	3.65	7	2.21561	2.23007	5.21	10	2.21324	2.20684	8.33	16	2.24828	2.20163	4.69	9	2.23564	2.25341	3.65	7	2.09766	2.10952	5.21	10	2.37066	2.33688	6.77083	13	2.11665	2.1545	5.72917	11	2.00873	1.99617	6.25	12	2.03839	2.0547	5.21	10	1.90255	1.86188	6.25
821	18	1	0	1	3.13	6	2.64795	2.67902	2.6	5	2.7523	2.75283	2.08	4	2.57314	2.61339	1.04	2	2.54849	2.55784	1.56	3	2.50183	2.5303	3.13	6	2.54078	2.51113	1.56	3	2.3023	2.2878	0	0	2.36216	2.33394	0.520833	1	2.48382	2.4781	2.08	4	2.38133	2.39782	2.08	4	2.37971	2.31768	3.65
822	25	0	0	0	3.646	7	2.77748	2.76333	5.729	11	2.79232	2.80237	4.167	8	2.87949	2.83835	11.46	22	2.93115	2.94703	9.375	18	2.96226	2.99027	10.42	20	2.94671	2.87595
823	25	0	0	1	0.52	1	2.74105	2.65001	1.56	3	3.01689	2.95491	2.08	4	2.90831	2.93584	3.65	7	3.16975	3.09594	4.17	8	2.90622	2.88462	1.04	2	3.02273	3.03017	3.13	6	2.41907	2.40943	1.5625	3	2.86855	2.89239	1.5625	3	2.54444	2.52422	2.6	5	2.63043	2.56829	3.65	7	2.5236	2.51246	2.6
824	21	0	0	0	3.65	7	2.93917	2.94904	5.21	10	2.99167	2.95753	6.25	12	2.90454	2.97377	5.73	11	2.94642	2.89567	6.77	13	2.88756	2.93457	6.25	12	2.94189	2.92074	2.6	5	2.95368	2.96537	4.16667	8	3.08248	3.09497	6.25	12	3.0339	2.90929	7.29	14	2.83206	2.78775	6.25	12	2.842	2.84073	7.29
825	20	0	0	1	2.08	4	3.03909	3.01442	2.08	4	3.06121	3.05747	3.65	7	3.08754	3.08263	2.08	4	2.96262	2.91517	3.13	6	2.85402	2.90832	2.08	4	3.12251	3.1519	2.08	4	2.86289	2.86076	1.04167	2	2.69078	2.72102	3.125	6	2.80918	2.81094	4.17	8	2.77469	2.78248	1.04	2	2.65467	2.68445	2.6
826	18	1	0	0	4.69	9	2.71889	2.73826	7.29	14	2.86599	2.88232	6.77	13	2.6723	2.70268	6.77	13	2.75193	2.68973	8.33	16	2.4672	2.42648	8.33	16	2.54307	2.5702	10.42	20	2.47539	2.44656	6.77083	13	2.46413	2.45954	6.77083	13	2.45569	2.45021	8.33	16	2.40786	2.41834	8.85	17	2.43745	2.46545	8.33
827	18	0	0	1	3.13	6	2.46752	2.45386	3.13	6	2.49831	2.52495	2.6	5	2.49971	2.46496	3.13	6	2.10636	2.31522	3.65	7	2.10096	2.35983	3.13	6	1.99937	2.23662	5.73	11	2.26605	2.25921	4.6875	9	2.34213	2.34203	4.6875	9	2.3397	2.3482	4.17	8	2.40861	2.40335	3.13	6	2.26552	2.2782	7.29
828	22	1	0	1	4.69	9	2.56425	2.54176	4.17	8	2.53288	2.52797	1.04	2	2.50355	2.48459	4.69	9	2.38532	2.3508	5.21	10	2.38004	2.33997	4.69	9	2.16848	2.19141	5.21	10	2.38018	2.33213	4.16667	8	2.31313	2.2477	4.16667	8	2.36215	2.36044	7.29	14	2.12446	2.08822	6.77	13	2.13286	2.09041	6.77
829	20	1	0	1	3.65	7	3.07742	3.14934	2.08	4	2.99207	2.93665	2.08	4	2.91088	2.92128	2.6	5	2.74815	2.77408	2.6	5	2.52905	2.57555	3.13	6	2.4759	2.50313	3.65	7	2.77911	2.80105	1.5625	3	2.66258	2.64809	0.520833	1	2.70913	2.73985	1.04	2	2.70361	2.66125	1.04	2	2.53087	2.48325	1.04
830	19	1	0	1	6.77	13	2.78587	2.69968	8.33	16	3.09386	2.98704	5.73	11	2.97983	3.02362	7.81	15	2.92453	2.8088	10.94	21	3.16847	3.02987	7.29	14	3.13279	3.068	1.56	3	2.73061	2.72743	2.60417	5	2.75043	2.71253	4.16667	8	3.15518	3.07346	4.17	8	2.93518	2.88318	4.69	9	3.08589	3.04788	1.04
831	18	0	0	0	2.6	5	2.73943	2.73646	4.69	9	2.7199	2.76048	4.69	9	2.75424	2.73241	6.77	13	2.65394	2.7119	6.77	13	2.96018	2.847	7.29	14	2.87624	2.83869	1.56	3	2.61659	2.60004	4.16667	8	2.56082	2.59775	3.64583	7	2.66653	2.65117	5.21	10	2.68581	2.6553	8.33	16	2.74225	2.69321	3.13
832	23	0	0	1	3.13	6	3.11893	3.08056	3.13	6	2.94918	2.91002	3.13	6	2.84621	2.87506	4.17	8	2.94381	2.92165	5.73	11	2.97833	2.9084	5.73	11	2.8545	2.82966	3.13	6	2.81729	2.82393	2.08333	4	2.72692	2.67398	3.125	6	2.88514	2.84171	3.13	6	3.05105	3.0642	2.6	5	3.05715	3.00724	4.69
833	20	1	0	0	6.25	12	3.30247	3.30845	9.38	18	3.57274	3.60079	10.42	20	3.69088	3.66883	3.13	6	3.49444	3.5403	8.33	16	3.48668	3.48418	3.65	7	3.30585	3.23476	2.6	5	3.21161	3.20937	2.08333	4	3.31679	3.30149	4.6875	9	3.36657	3.34915	3.13	6	3.22485	3.26947	3.65	7	3.08298	3.01172	2.6
834	20	0	1	1	11.46	22	4.01481	3.9938	10.94	21	3.78581	3.8226	10.42	20	3.52641	3.48129	8.85	17	3.49304	3.4855	6.77	13	3.29335	3.27347	10.42	20	3.35158	3.27034	4.69	9	3.18036	3.06595	3.64583	7	3.14986	3.11706	5.20833	10	3.22357	3.26003	8.33	16	3.13401	3.09215	7.29	14	3.08679	3.0627	8.85
835	20	1	0	0	4.69	9	3.4725	3.4529	3.13	6	3.64907	3.6592	6.25	12	3.52042	3.59075	5.73	11	3.31793	3.34362	6.25	12	3.43806	3.47648	6.25	12	3.39357	3.37619	4.69	9	3.17907	3.15287	2.08333	4	3.25637	3.21487	4.6875	9	3.25731	3.27635	3.65	7	3.332	3.29053	6.77	13	3.22434	3.21787	3.13
836	24	1	1	1	15.1	29	3.85304	3.83494	5.73	11	3.37452	3.35015	6.77	13	3.20297	3.1186	4.69	9	3.1017	3.04147	4.69	9	2.97839	3.02968	7.29	14	3.19914	3.06852	3.65	7	2.91102	2.88964	5.72917	11	2.97716	2.95417	1.04167	2	3.01064	3.05244	4.69	9	2.89376	2.80846	6.77	13	3.11101	3.11947	5.73
837	23	0	0	1	7.29	14	3.66886	3.72399	7.29	14	3.51006	3.56419	9.38	18	3.43248	3.38873	4.17	8	3.39398	3.42453	4.69	9	3.34121	3.35848	15.1	29	3.41275	3.52255	2.6	5	3.20609	3.19105	2.60417	5	3.25237	3.29105	8.33333	16	3.23667	3.25734	5.21	10	3.21566	3.23255	10.42	20	3.2627	3.21225	11.46
838	22	0	0	0	10.94	21	2.95645	2.89074	5.21	10	3.19235	3.25073	6.25	12	2.78467	2.78533	6.25	12	3.17433	3.02753	8.85	17	3.09752	2.98567	8.33	16	2.79974	2.81554	4.69	9	2.87455	2.75745	5.72917	11	2.91617	2.96542	6.25	12	2.92797	2.88626	5.73	11	2.90104	2.83654	7.81	15	3.0028	2.99	9.38
[truncated: 21 more columns]
